# Supplementary material for: Patient-Reported Outcome Measures in Atopic Dermatitis and Chronic Hand Eczema in Adults
Source: Springer Nature journal article supplement (doi:10.1007/s40271-019-00373-y), 2019-07-04
Supplement: MOESM1 [file 24127350]

# Supplemental Appendix

## Online Resource 1. PubMed Literature Search Strategy

| Search Number             | Search Terms                                                                                                                                                                                                                                                                                                                                                            | Number of Results |
|---------------------------|-------------------------------------------------------------------------------------------------------------------------------------------------------------------------------------------------------------------------------------------------------------------------------------------------------------------------------------------------------------------------|-------------------|
| <b>Disease/Condition</b>  |                                                                                                                                                                                                                                                                                                                                                                         |                   |
| #1                        | “Dermatitis, Atopic”[Mesh] OR “atopic dermatitis”[Text Word] OR “atopic eczema”[Text Word] OR “hand eczema”[Text Word] OR “hand dermatitis”[Text Word]                                                                                                                                                                                                                  | 11,352            |
| <b>Drugs</b>              |                                                                                                                                                                                                                                                                                                                                                                         |                   |
| #2                        | dupilumab OR lebrikizumab OR nemolizumab or alitretinoin OR tacrolimus OR pimecrolimus OR ruxolitinib OR crisaborole OR desonide OR cyclosporine                                                                                                                                                                                                                        | 23,858            |
| <b>Symptoms/Impact</b>    |                                                                                                                                                                                                                                                                                                                                                                         |                   |
| #3                        | symptom* OR pruritus OR itch* OR scratch* OR dry OR scaly OR crack* OR thick* OR leak* OR crust* OR swollen OR red OR broken OR bleed* OR HRQOL OR HRQL OR QOL OR “quality of life” OR sleep OR pain OR impact OR burden OR function OR functioning OR depress* OR anxiety OR anxious OR mood OR patient-reported or self-reported OR “patient report” OR “self report” | 5,764,020         |
| <b>Study Type</b>         |                                                                                                                                                                                                                                                                                                                                                                         |                   |
| #4                        | “clinical trial” OR random* OR double-blind OR double-blinded OR control* OR placebo OR “Clinical Trial”[Publication Type]                                                                                                                                                                                                                                              | 2,563,879         |
| <b>Combination Search</b> |                                                                                                                                                                                                                                                                                                                                                                         |                   |
| #5                        | #1 AND #2 AND #3 AND # 4                                                                                                                                                                                                                                                                                                                                                | 260               |

| Search Number                | Search Terms                                                                                  | Number of Results |
|------------------------------|-----------------------------------------------------------------------------------------------|-------------------|
| <b>Exclusionary Searches</b> |                                                                                               |                   |
| #6                           | "Animals"[Mesh] NOT "Humans"[Mesh]                                                            | 1,143,792         |
| #7                           | dog or dogs or canine or canines                                                              | 69,265            |
| #8                           | "Comment"[Publication Type] OR "Letter"[Publication Type] OR<br>"Editorial"[Publication Type] | 696,116           |
| <b>#9</b>                    | <b>(#9) NOT (#10 OR #11)</b>                                                                  | <b>213</b>        |

Note: Limitations: Publication date 2006 to 2017; English language. Search conducted March 7, 2017.

MeSH = Medical Subject Heading.

## Online Resource 2. PROMs in Clinical Trials of AD Drugs

| Study Reference       | Study Design/<br>Patient Population                                                                                                     | Intervention         | PROMs Used                                                                                                                                                             | Findings Based on PRO Endpoints                                                                                                                                                                                                                                                                                                                                                                 |
|-----------------------|-----------------------------------------------------------------------------------------------------------------------------------------|----------------------|------------------------------------------------------------------------------------------------------------------------------------------------------------------------|-------------------------------------------------------------------------------------------------------------------------------------------------------------------------------------------------------------------------------------------------------------------------------------------------------------------------------------------------------------------------------------------------|
| Beck et al., 2014     | Phase 2a<br>RCT with 207 adults who had moderate-to-severe AD despite treatment with topical glucocorticoids and calcineurin inhibitors | Dupilumab v. placebo | Pruritus NRS (0-10, with higher scores indicating greater itch)<br>5-D pruritus scale (on which scores range from 5 to 25, with higher scores indicating greater itch) | Pruritus scores on the NRS decreased (indicating a reduction in itch) by 55.7% in the dupilumab group versus 15.1% in the placebo group ( $P < 0.001$ ) at 12 weeks.<br><br>5-D pruritus results not reported.                                                                                                                                                                                  |
| Simpson et al., 2016b | Phase 2b<br>RCT with 380 adults with moderate-to-severe AD                                                                              | Dupilumab v. placebo | Pruritus NRS<br>POEM<br>HADS<br>DLQI<br>EQ-5D                                                                                                                          | Dupilumab reduced peak itch at 16 weeks relative to placebo by 1.1 to 3.2 points on Numeric Rating Scale ( $P < 0.0001$ all doses, except 100 mg every 4 weeks $P < 0.05$ ); improved sleep and HRQOL on DLQI and EQ-5D ( $P < .05$ all doses, except 100 mg every 4 weeks); and reduced anxiety and depression symptoms ( $P < .05$ all doses).                                                |
| Simpson et al., 2016a | Phase 3<br>Two 16-week studies<br>Study 1 (SOLO 1) and Study 2 (SOLO 2):<br>dupilumab (QW, Q2W) vs. placebo                             | Dupilumab v. placebo | Peak Pruritus NRS (key secondary endpoint)<br>POEM<br>HADS<br>DLQI                                                                                                     | <u>Combined results for SOLO 1 and SOLO 2</u><br>Peak Pruritus NRS: Scores improved at least 3 points or at least 4 points in significantly more patients receiving dupilumab v. placebo ( $P < 0.001$ for all comparisons).<br><br>By week 2, patient-reported scores with respect to itching were significantly better among patients receiving dupilumab than among those receiving placebo. |

| Study Reference      | Study Design/<br>Patient Population                                                                         | Intervention                         | PROMs Used                                                                                                  | Findings Based on PRO Endpoints                                                                                                                                                                                                                                                                                                                                                                                                                                                                                                                                                                                                                                                                                                                                  |
|----------------------|-------------------------------------------------------------------------------------------------------------|--------------------------------------|-------------------------------------------------------------------------------------------------------------|------------------------------------------------------------------------------------------------------------------------------------------------------------------------------------------------------------------------------------------------------------------------------------------------------------------------------------------------------------------------------------------------------------------------------------------------------------------------------------------------------------------------------------------------------------------------------------------------------------------------------------------------------------------------------------------------------------------------------------------------------------------|
|                      | <p>Study 1: 671 adults with moderate-to-severe AD</p> <p>Study 2: 708 adults with moderate-to-severe AD</p> |                                      |                                                                                                             | <p>POEM: Differences in patient-reported symptoms of AD and effect on sleep were significantly better for the dupilumab groups (<math>P &lt; 0.001</math>).</p> <p>HADS: Among patients who had symptoms of anxiety or depression (HADS-A or HADS-D score <math>\geq 8</math>) at baseline, significantly more dupilumab-treated patients than those receiving placebo had HADS-A and HADS-D scores of less than 8 at week 16 (<math>P &lt; 0.001</math>).</p> <p>DLQI: Significantly more patients in the two dupilumab groups v. placebo groups had a reduction of at least 4 points (considered to be MCID) in total score (<math>P &lt; .001</math>).</p>                                                                                                    |
| Ruzicka et al., 2017 | <p>Phase 2</p> <p>12-week RCT with 264 adults with moderate-to-severe AD</p>                                | <p>Nemolizumab</p> <p>v. placebo</p> | <p>Pruritus VAS</p> <p>Pruritus VRS (0-4, none to very severe)</p> <p>Sleep disturbance VAS</p> <p>DLQI</p> | <p>At 12 weeks, there was a significant, dose-dependent reduction in pruritus VAS scores for the nemolizumab group versus placebo (<math>P</math> values ranged from 0.002 to <math>&lt; 0.001</math>).</p> <p>Change in the score on the pruritus VRS were <math>-36.8 \pm 4.6\%</math> with 0.1 mg per kilogram, <math>-50.9 \pm 4.6\%</math> with 0.5 mg per kilogram, and <math>-57.6 \pm 4.6\%</math> with 2.0 mg per kilogram, as compared with <math>-16.2 \pm 5.0\%</math> with placebo (<math>P</math> values not reported).</p> <p>Changes in sleep disturbance VAS were <math>-52.3 \pm 5.8\%</math> with 0.1 mg of nemolizumab per kilogram, <math>-59.1 \pm 5.8\%</math> with 0.5 mg per kilogram, and <math>-62.6 \pm 5.9\%</math> with 2.0 mg</p> |

| Study Reference              | Study Design/<br>Patient Population                                                                       | Intervention              | PROMs Used                 | Findings Based on PRO Endpoints                                                                                                                                                                                                                                                                                                                                                                                      |
|------------------------------|-----------------------------------------------------------------------------------------------------------|---------------------------|----------------------------|----------------------------------------------------------------------------------------------------------------------------------------------------------------------------------------------------------------------------------------------------------------------------------------------------------------------------------------------------------------------------------------------------------------------|
| Poole et al.,<br>2009        | Phase 3<br>Data from a clinical trial with 257 patients (16 and older) with mild, moderate, and severe AD | Tacrolimus v. placebo     | SF-36                      | per kilogram, as compared with $-31.9 \pm 6.3\%$ with placebo ( <i>P</i> values not reported).<br><br>The LS mean DLQI scores changed by $-5$ to $-7$ points for all nemolizumab Q4W groups (the criteria for MCID is $> 4$ units).<br><br>At week 12, the LS mean change in DLQI score was $-5.2$ , $-6.1$ , and $-7.0$ in the nemolizumab 0.1, 0.5, and 2.0 mg/kg dose groups, respectively v. $-4.3$ for placebo. |
| Reitamo and Allsopp,<br>2010 | Phase 3<br>2 RCTs with 322 adults and children with mild, moderate, or severe AD                          | Tacrolimus v. placebo     | Pruritus VAS<br>DLQI/CDLQI | In adults, QOL improved from a score of $10.6 \pm 6.7$ to $5.5 \pm 5.2$ on the DLQI.<br><br>Pruritus results not reported.                                                                                                                                                                                                                                                                                           |
| Doss et al.,<br>2009         | Phase 4<br>Patients 16 and older with moderate-to-severe AD of the face in whom conventional treatment    | Tacrolimus v. fluticasone | Pruritus VAS               | Baseline facial pruritus was severe in both groups (mean VAS scores $65 \pm 25$ mm in both groups). At day 7, median relative changes from baseline were $-69.5\%$ in the tacrolimus group and $-71.8\%$ in the fluticasone group, with further improvement at day 21 or EOT ( $-$                                                                                                                                   |

| Study Reference          | Study Design/<br>Patient Population                                                                                                     | Intervention                                      | PROMs Used                                                                                                                                                | Findings Based on PRO Endpoints                                                                                                                                                                                                                                                                                                                                                                                                                                         |
|--------------------------|-----------------------------------------------------------------------------------------------------------------------------------------|---------------------------------------------------|-----------------------------------------------------------------------------------------------------------------------------------------------------------|-------------------------------------------------------------------------------------------------------------------------------------------------------------------------------------------------------------------------------------------------------------------------------------------------------------------------------------------------------------------------------------------------------------------------------------------------------------------------|
|                          | was ineffectual or poorly tolerated                                                                                                     |                                                   |                                                                                                                                                           | 89.3% and -88.3%, respectively). Between-group differences were not statistically significant.                                                                                                                                                                                                                                                                                                                                                                          |
| Kim and Kono, 2011       | Pooled analysis of studies in eight Asian areas; total of 860 adults and children with AD                                               | Tacrolimus                                        | Pruritus VAS<br>DLQI/CDLQI                                                                                                                                | The change in patient's assessment of pruritus measured by VAS score from baseline was -3 cm at the end of treatment.<br><br>The improvements in total QOL score from baseline to the end of treatment were observed in adults and children.                                                                                                                                                                                                                            |
| Boguniewicz et al., 2007 | Open-label, non-comparative, multicenter study<br>Adult (n = 18) and pediatric (5-16 years, n = 22) patients with moderate-to-severe AD | Tacrolimus ointment (open-label, non-comparative) | SF-12<br>DLQI (CDQLI for pediatric patients)<br>Bergner Physical Appearance Scale (measures patient perception of appearance)<br>Productivity/absenteeism | Adult patient DLQI scores showed downward trends, but they were not statistically significant ( $P = 1.38$ ; $P = .202$ ).<br>SF-12 scores showed mixed trends for physical and mental components; none were statistically significant.<br>No statistically significant changes in patient or caregiver-reported physical appearance<br>There was a significant decrease in work absenteeism from baseline (30.3% missing some work) to month 6 (0% missing some work). |
| Reitamo et al., 2008     | Long-term follow-up study<br>4-year follow-up study with 782 AD patients aged 2 and older                                               | Tacrolimus                                        | Treatment satisfaction (excellent, very good, good, fair, and poor)                                                                                       | At the end of the study or at the time of withdrawal, 75.0% of the patients rated their satisfaction with treatment as excellent, very good or good.                                                                                                                                                                                                                                                                                                                    |

| Study Reference         | Study Design/<br>Patient Population                                                                                                                                                                               | Intervention                  | PROMs Used                                                                                                                                                              | Findings Based on PRO Endpoints                                                                                                                                                                                                                                                                       |
|-------------------------|-------------------------------------------------------------------------------------------------------------------------------------------------------------------------------------------------------------------|-------------------------------|-------------------------------------------------------------------------------------------------------------------------------------------------------------------------|-------------------------------------------------------------------------------------------------------------------------------------------------------------------------------------------------------------------------------------------------------------------------------------------------------|
| Leung et al., 2009      | No phase specified<br>RCT with 73 patients with AD, aged 2-49, with a clinical insensitivity to topical corticosteroids (determined by <i>Staphylococcus aureus</i> colonization and production of superantigens) | Pimecrolimus<br>v. placebo    | Pruritus (4-point scale, where 0=absent and 3=severe)<br><br>Patient assessment of disease control (4-point scale, where 0=complete control and 3=uncontrolled disease) | An increase in <i>S. aureus</i> counts correlated with clinical worsening (week 6 vs. baseline) when assessed by IGA and patient assessments of pruritus severity and disease control.<br><br>Patient assessments of disease control and pruritus were comparable between treatment groups at week 6. |
| Luger et al., 2007      | Patient self-observation study in 3,502 patients with AD                                                                                                                                                          | Pimecrolimus                  | Pruritus (6-point scale)<br>Erythema (6-point scale)                                                                                                                    | Patients reported marked improvement after only 2 weeks. Compared with the values recorded at treatment initiation from the previous year, the intensity of redness and pruritus decreased by nearly 2 points (from severe to mild).                                                                  |
| Onumah and Kircik, 2013 | Open-label patient preference study with 20 children (2 years and older) and adults with moderate AD                                                                                                              | Pimecrolimus<br>v. tacrolimus | Product preference questionnaire (included product rating/assessment, pruritus, burning, stinging, pain, and global assessment)<br><br>DLQI/CDLQI                       | Mean change in DLQI was 4.7 for pimecrolimus compared with 3.6 for tacrolimus.<br><br>Pimecrolimus scores were higher (i.e., better) in every category of the product preference questionnaire compared with tacrolimus.                                                                              |

| <b>Study Reference</b>   | <b>Study Design/<br/>Patient Population</b>                                                     | <b>Intervention</b>                            | <b>PROMs Used</b>                                                                                               | <b>Findings Based on PRO Endpoints</b>                                                                                                                                                                                                                                                                                               |
|--------------------------|-------------------------------------------------------------------------------------------------|------------------------------------------------|-----------------------------------------------------------------------------------------------------------------|--------------------------------------------------------------------------------------------------------------------------------------------------------------------------------------------------------------------------------------------------------------------------------------------------------------------------------------|
| Kircik, 2014             | Pilot study<br><br>Open-label study in 20 AD patients aged 7 or older                           | Desonide hydrogel                              | Pruritus VAS                                                                                                    | All subjects had 50% or greater improvement in pruritus at day 7.                                                                                                                                                                                                                                                                    |
| Trookman et al., 2011    | Patient preference study with 22 adults with mild-to-moderate AD                                | Desonide hydrogel                              | Patient preference                                                                                              | Desonide hydrogel rated highly in aesthetic attributes important to AD patients and was preferred by a majority of patients to other vehicles used in the past.                                                                                                                                                                      |
| Trookman and Rizer, 2011 | Patient preference study with 46 individuals 12 years of age and older with mild-to-moderate AD | Desonide hydrogel v. desonide ointment         | Burning/stinging (0-3 scale)<br>Dryness (0-3 scale)<br>Pruritus (0-3 scale)<br>Vehicle Preference Questionnaire | All symptom measures declined significantly from baseline at weeks 2 and 4 for patients receiving both desonide hydrogel and ointment ( $P < 0.05$ ).<br><br>Desonide hydrogel was rated significantly better than desonide ointment ( $P < 0.05$ ) on absorption (week 4) and the (lack of) greasiness of the formulation (week 2). |
| Koppelhus et al., 2014   | Randomized crossover study with 20 patients with severe AD                                      | Cyclosporine A v. extracorporeal photopheresis | Pruritus VAS<br>Patient global assessment                                                                       | The average reduction in pruritus was a little higher for photopheresis treatment compared with cyclosporine, but the differences did not reach statistical significance. Photopheresis was rated “good” or “very good” by 74% of participants, while only 6% gave this rating to cyclosporine.                                      |
| Paller et al., 2016      | Phase 3 RCT with children (2 years and older) and                                               | Crisaborole v. placebo                         | Pruritus severity (measure not specified)                                                                       | Crisaborole-treated patients achieved improvement in pruritus earlier than vehicle-treated patients (pooled data, 1.37 vs 1.70 days, $P = 0.001$ ).                                                                                                                                                                                  |



| Study Reference | Study Design/<br>Patient Population | Intervention | PROMs Used | Findings Based on PRO Endpoints |
|-----------------|-------------------------------------|--------------|------------|---------------------------------|
|                 | adults with mild-to-moderate AD     |              |            |                                 |

AD = atopic dermatitis; CDLQI = Children's Dermatology Life Quality Index; DLQI = Dermatology Life Quality Index; EOT = end of treatment; EQ-5D = EuroQol 5-Dimensions; HADS = Hospital Anxiety and Depression Scale; HRQOL = health-related quality of life; IGA = Investigator Global Assessment; LS = least squares; MCID = minimal clinically important difference; NRS = numerical rating scale; POEM = Patient-Oriented Eczema Measure; PROM = patient-reported outcome measure; Q2W = every 2 weeks; Q4W = every 4 weeks; QW = every week; QOL = quality of life; RCT = randomized controlled trial; SF-36 = 36-Item Short Form Health Survey; VAS = visual analog scale; VRS = verbal rating scale.

### Online Resource 3. PROMs in Clinical Trials of CHE Drugs

| Study Reference      | Study Design/<br>Patient Population                                                                                                                          | Intervention                                                                                            | PROMs Used                                                                | Findings Based on PRO Endpoints                                                                                                                                                                                                                                                                                                                                                                                             |
|----------------------|--------------------------------------------------------------------------------------------------------------------------------------------------------------|---------------------------------------------------------------------------------------------------------|---------------------------------------------------------------------------|-----------------------------------------------------------------------------------------------------------------------------------------------------------------------------------------------------------------------------------------------------------------------------------------------------------------------------------------------------------------------------------------------------------------------------|
| Ruzicka et al., 2004 | Phase 2<br>12-week RCT<br>conducted in 43<br>outpatient clinics in<br>Europe with 319<br>patients with moderate<br>or severe refractory<br>CHE               | Oral alitretinoin<br>10 mg/d, 20<br>mg/d, and 40<br>mg/d,<br>compared with<br>placebo<br>control        | Patient global<br>assessment of<br>improvement<br><br>DLQI                | <ul style="list-style-type: none"> <li>▪ Patient global assessment: Number of patients rating their response as “clear or almost clear” was significantly higher with all doses of alitretinoin than with placebo (<math>P = .01</math> for 10 mg/d, <math>P = .002</math> for 20 mg/d, and <math>P &lt; .001</math> for 40 mg/d)</li> <li>▪ DLQI: Between-group differences were not statistically significant.</li> </ul> |
| Fowler et al, 2014   | Phase 3<br>RCT with 596 patients<br>with severe CHE<br>refractory to topical<br>corticosteroids                                                              | Alitretinoin v.<br>placebo                                                                              | Patient global<br>assessment<br><br>Skindex-29                            | <ul style="list-style-type: none"> <li>▪ A greater proportion of alitretinoin patients achieved patient global assessment of cleared or almost cleared at end of trial (OR = 4.05, <math>P &lt; 0.001</math>).</li> <li>▪ Skindex-29 total and subscale (Emotions, Symptoms, Functioning) scores were significantly improved at EOT for alitretinoin patients vs. placebo (<math>P &lt; 0.001</math> for all).</li> </ul>   |
| Ruzicka et al., 2008 | 24-week RCT<br>conducted in 111<br>dermatology outpatient<br>clinics in Europe and<br>Canada with a total of<br>1,032 patients with<br>severe refractory CHE | Oral alitretinoin<br>10 mg or 30 mg<br>or placebo daily<br>(1:2:2 ratio of<br>placebo, 10 mg,<br>30 mg) | Patient global<br>assessment of<br>improvement<br>(secondary<br>endpoint) | <p>Patient global assessment, n (%) clear or almost clear</p> <ul style="list-style-type: none"> <li>▪ 30 mg      163 (40%) (<math>P &lt; 0.001</math> vs. placebo)</li> <li>▪ 10 mg      101 (24%) (<math>P &lt; 0.02</math> vs. placebo)</li> <li>▪ Placebo    31 (15%)</li> </ul>                                                                                                                                        |

| Study Reference        | Study Design/<br>Patient Population                                                                                        | Intervention            | PROMs Used                                                                                               | Findings Based on PRO Endpoints                                                                                                                                                                                                                                                                                                                                                                                                                                                                                                                                                                                                                                                                                                                                                                                                                                                                                                                                                                                                                                       |
|------------------------|----------------------------------------------------------------------------------------------------------------------------|-------------------------|----------------------------------------------------------------------------------------------------------|-----------------------------------------------------------------------------------------------------------------------------------------------------------------------------------------------------------------------------------------------------------------------------------------------------------------------------------------------------------------------------------------------------------------------------------------------------------------------------------------------------------------------------------------------------------------------------------------------------------------------------------------------------------------------------------------------------------------------------------------------------------------------------------------------------------------------------------------------------------------------------------------------------------------------------------------------------------------------------------------------------------------------------------------------------------------------|
| Dirschka et al., 2011  | Open-label study with 249 patients aged 18–75 years with severe CHE unresponsive to treatment with topical corticosteroids | Alitretinoin            | Patient global assessment<br>Pain VAS<br>Pruritus VAS<br>Categorical rating scale for pruritus<br>PBI-HE | <ul style="list-style-type: none"> <li>▪ Patient global assessment : 115 (46.2%) patients rated their disease as “clear or almost clear” at the end of treatment; results of the patient global assessment were “comparable with” PGA results (46.6% were responders, with PGA ratings of “clear” or “almost clear” hands, and 63.9% were classified as at least partial responders, with ratings of “clear,” “almost clear,” or “mild disease”).</li> <li>▪ Pruritus categorical scale: At baseline, the intensity of pruritus was described as moderate (36.9% of patients) or severe (39.0% of patients), whereas only 4.0% described pruritus as absent. At end of treatment, pruritus was absent in 57.0% of the patients and 19.6% described their pruritus as severe (8.0%) or moderate (11.6%).</li> <li>▪ VAS ratings of both pain and pruritus intensity showed corresponding decreases at the end of treatment (–33.2% and –49.6% mean change, and –88.9% and -89.4% median change from baseline, respectively) (<i>P</i> values not reported).</li> </ul> |
| Hordinsky et al., 2010 | RCT with 652 adults with mild-to-moderate CHE                                                                              | Pimecrolimus v. placebo | Pruritus severity<br>Burning severity<br>Both measured on a 0-3 scale, where 0 = absent and 3 = severe   | <ul style="list-style-type: none"> <li>▪ The proportion of patients experiencing pruritus relief was significantly higher in the pimecrolimus group (83.7%) compared with the vehicle group (72.8%) at the end of week 6.</li> <li>▪ No statistically significant difference was seen between the treatment groups with respect to burning.</li> </ul>                                                                                                                                                                                                                                                                                                                                                                                                                                                                                                                                                                                                                                                                                                                |

CHE = chronic hand eczema; PBI-HE = Patient Benefit Index-Hand Eczema; RCT = randomized controlled trial; VAS = visual analog scale.
